# Supplementary material for: Factors Associated with Reduced Heart Rate Variability in the General Japanese Population: The Iwaki Cross-Sectional Research Study
Source: MDPI journal article supplement (doi:10.3390/healthcare10050793), 2022-04-24
Supplement: s1 [file s1]

Table S1. Univariate analysis of the association with LH, HF and LF/HF

| Characteristics    | Unit              | LF (ms <sup>2</sup> ) |                  |         | HF (ms <sup>2</sup> ) |                  |         | LF/HF   |                 |         |
|--------------------|-------------------|-----------------------|------------------|---------|-----------------------|------------------|---------|---------|-----------------|---------|
|                    |                   | $\beta$               | 95% CI           | p-value | $\beta$               | 95% CI           | p-value | $\beta$ | 95% CI          | p-value |
| Age                | years             | -9.61                 | -11.69 ~ -7.53   | <0.001  | -4.85                 | -6.25 ~ -3.45    | <0.001  | -0.015  | -0.034 ~ 0.004  | 0.133   |
| Sex                | women             | -137.86               | -203.30 ~ -72.42 | <0.001  | 11.91                 | -31.75 ~ 55.58   | 0.593   | -0.993  | -1.573 ~ -0.412 | 0.001   |
| BMI                | kg/m <sup>2</sup> | -9.98                 | -18.92 ~ -1.04   | 0.029   | -11.27                | -17.16 ~ -5.39   | <0.001  | 0.124   | 0.045 ~ 0.202   | 0.002   |
| HbA1c              | %                 | -100.07               | -152.86 ~ -47.29 | <0.001  | -71.03                | -105.92 ~ -36.14 | <0.001  | 0.166   | -0.304 ~ 0.637  | 0.487   |
| Glycoalbumin       | %                 | -28.94                | -45.40 ~ -12.49  | 0.001   | -16.61                | -27.51 ~ -5.70   | 0.003   | -0.077  | -0.224 ~ 0.069  | 0.302   |
| Blood glucose      | mg/dL             | -3.96                 | -5.94 ~ -1.99    | <0.001  | -3.36                 | -4.66 ~ -2.06    | <0.001  | 0.011   | -0.006 ~ 0.029  | 0.215   |
| Triglyceride       | mg/dL             | -0.20                 | -0.59 ~ 0.19     | 0.306   | -0.43                 | -0.69 ~ -0.17    | 0.001   | 0.003   | 0.000 ~ 0.007   | 0.046   |
| Total cholesterol  | mg/dL             | -1.46                 | -2.39 ~ -0.53    | 0.002   | -0.93                 | -1.55 ~ -0.31    | 0.003   | 0.000   | -0.008 ~ 0.008  | 0.958   |
| HDL cholesterol    | mg/dL             | -1.82                 | -3.77 ~ 0.13     | 0.068   | 0.30                  | -1.00 ~ 1.59     | 0.654   | -0.023  | -0.040 ~ -0.005 | 0.010   |
| LDL cholesterol    | mg/dL             | -1.17                 | -2.25 ~ -0.09    | 0.033   | -0.83                 | -1.54 ~ -0.12    | 0.022   | 0.003   | -0.006 ~ 0.013  | 0.488   |
| ALT                | U/L               | 0.56                  | -1.73 ~ 2.86     | 0.629   | -1.14                 | -2.66 ~ 0.38     | 0.140   | 0.024   | 0.003 ~ 0.044   | 0.023   |
| AST                | U/L               | -2.95                 | -7.04 ~ 1.14     | 0.157   | -2.75                 | -5.45 ~ -0.05    | 0.046   | 0.020   | -0.016 ~ 0.057  | 0.267   |
| $\gamma$ -GTP      | U/L               | -0.11                 | -0.90 ~ 0.69     | 0.796   | -0.61                 | -1.13 ~ -0.08    | 0.023   | 0.010   | 0.003 ~ 0.017   | 0.007   |
| Creatinine         | mg/dL             | -6.70                 | -67.00 ~ 53.60   | 0.827   | -26.06                | -65.93 ~ 13.80   | 0.200   | 0.059   | -0.474 ~ 0.593  | 0.828   |
| Urea nitrogen      | mg/dL             | -13.07                | -20.24 ~ -5.89   | <0.001  | -8.11                 | -12.86 ~ -3.36   | 0.001   | -0.016  | -0.080 ~ 0.047  | 0.614   |
| Plasma pentosidine | pmol/mL           | -3.64                 | -5.60 ~ -1.69    | <0.001  | -1.45                 | -2.75 ~ -0.15    | 0.029   | -0.016  | -0.033 ~ 0.002  | 0.080   |
| SBP                | mmHg              | -3.81                 | -5.72 ~ -1.90    | <0.001  | -2.47                 | -3.73 ~ -1.20    | <0.001  | -0.004  | -0.022 ~ 0.013  | 0.607   |
| DBP                | mmHg              | -5.11                 | -7.96 ~ -2.26    | <0.001  | -4.85                 | -6.72 ~ -2.98    | <0.001  | 0.009   | -0.016 ~ 0.034  | 0.482   |

$\gamma$ -GTP,  $\gamma$ -glutamyl transferase; ALT, alanine transaminase; AST, aspartate transaminase; CI, confidence interval; DBP, diastolic blood pressure; HbA1c, hemoglobin A1c; HDL, high density lipoprotein; HF, high-frequency component power; LDL, low density lipoprotein; LF, low-frequency component power; SBP, systolic blood pressure.

Table S2. Multivariate analysis of the association with LH, HF and LF/HF (Model 1)

| Characteristics    | Unit    | LF (ms <sup>2</sup> ) |                |         | HF (ms <sup>2</sup> ) |                |         | LF/HF   |                |         |
|--------------------|---------|-----------------------|----------------|---------|-----------------------|----------------|---------|---------|----------------|---------|
|                    |         | $\beta$               | 95% CI         | p-value | $\beta$               | 95% CI         | p-value | $\beta$ | 95% CI         | p-value |
| HbA1c              | %       | -26.87                | -81.71 ~ 27.96 | 0.336   | -26.75                | -63.91 ~ 10.40 | 0.158   | 0.079   | -0.427 ~ 0.586 | 0.758   |
| Glycoalbumin       | %       | -5.46                 | -22.11 ~ 11.20 | 0.520   | -7.33                 | -18.61 ~ 3.95  | 0.203   | -0.011  | -0.165 ~ 0.143 | 0.890   |
| Blood glucose      | mg/dL   | -1.57                 | -3.69 ~ 0.55   | 0.146   | -1.68                 | -3.11 ~ -0.24  | 0.022   | 0.005   | -0.014 ~ 0.025 | 0.600   |
| Triglyceride       | mg/dL   | -0.31                 | -0.70 ~ 0.09   | 0.129   | -0.34                 | -0.61 ~ -0.07  | 0.013   | 0.001   | -0.003 ~ 0.005 | 0.549   |
| Total cholesterol  | mg/dL   | -0.30                 | -1.22 ~ 0.63   | 0.529   | -0.38                 | -1.01 ~ 0.24   | 0.230   | 0.001   | -0.007 ~ 0.010 | 0.753   |
| HDL cholesterol    | mg/dL   | -0.80                 | -2.91 ~ 1.32   | 0.460   | -0.25                 | -1.68 ~ 1.19   | 0.737   | -0.006  | -0.026 ~ 0.014 | 0.548   |
| LDL cholesterol    | mg/dL   | 0.00                  | -1.07 ~ 1.07   | 0.999   | -0.14                 | -0.87 ~ 0.58   | 0.695   | 0.002   | -0.008 ~ 0.012 | 0.645   |
| ALT                | U/L     | -0.55                 | -3.06 ~ 1.95   | 0.665   | -0.44                 | -2.14 ~ 1.26   | 0.609   | 0.003   | -0.020 ~ 0.026 | 0.809   |
| AST                | U/L     | -0.41                 | -4.55 ~ 3.73   | 0.847   | -0.06                 | -2.87 ~ 2.75   | 0.966   | 0.004   | -0.034 ~ 0.043 | 0.818   |
| $\gamma$ -GTP      | U/L     | -0.44                 | -1.24 ~ 0.36   | 0.283   | -0.46                 | -1.00 ~ 0.09   | 0.098   | 0.006   | -0.001 ~ 0.013 | 0.117   |
| Creatinine         | mg/dL   | -23.52                | -82.21 ~ 35.17 | 0.432   | -18.65                | -58.44 ~ 21.13 | 0.358   | -0.137  | -0.679 ~ 0.405 | 0.620   |
| Urea nitrogen      | mg/dL   | -2.95                 | -10.53 ~ 4.63  | 0.445   | -1.70                 | -6.84 ~ 3.44   | 0.516   | -0.017  | -0.087 ~ 0.053 | 0.634   |
| Plasma pentosidine | pmol/mL | -1.64                 | -3.59 ~ 0.32   | 0.101   | -0.53                 | -1.86 ~ 0.80   | 0.433   | -0.010  | -0.028 ~ 0.008 | 0.282   |
| SBP                | mmHg    | -1.15                 | -3.18 ~ 0.88   | 0.265   | -0.61                 | -1.99 ~ 0.76   | 0.382   | -0.011  | -0.029 ~ 0.008 | 0.264   |
| DBP                | mmHg    | -3.54                 | -6.44 ~ -0.63  | 0.017   | -3.28                 | -5.24 ~ -1.32  | 0.001   | -0.003  | -0.030 ~ 0.024 | 0.823   |

Model 1: Adjusted for age, sex, and BMI.

$\gamma$ -GTP,  $\gamma$ -glutamyl transferase; ALT, alanine transaminase; AST, aspartate transaminase; CI, confidence interval; DBP, diastolic blood pressure; HbA1c, hemoglobin A1c; HDL, high density lipoprotein; HF, high-frequency component power; LDL, low density lipoprotein; LF, low-frequency component power; SBP, systolic blood pressure.

Table S3. Multivariate analysis of the association with LH, HF and LF/HF (Model 2)

| Characteristics    | Unit    | LF (ms <sup>2</sup> ) |                |         | HF (ms <sup>2</sup> ) |                |         | LF/HF   |                |         |
|--------------------|---------|-----------------------|----------------|---------|-----------------------|----------------|---------|---------|----------------|---------|
|                    |         | $\beta$               | 95% CI         | p-value | $\beta$               | 95% CI         | p-value | $\beta$ | 95% CI         | p-value |
| HbA1c              | %       | -22.15                | -78.47 ~ 34.17 | 0.440   | -26.01                | -63.73 ~ 11.70 | 0.176   | 0.188   | -0.330 ~ 0.706 | 0.476   |
| Glycoalbumin       | %       | -6.00                 | -22.97 ~ 10.98 | 0.488   | -7.14                 | -18.51 ~ 4.23  | 0.218   | 0.005   | -0.152 ~ 0.161 | 0.954   |
| Blood glucose      | mg/dL   | -1.50                 | -3.69 ~ 0.68   | 0.177   | -1.82                 | -3.28 ~ -0.36  | 0.014   | 0.006   | -0.014 ~ 0.026 | 0.542   |
| Triglyceride       | mg/dL   | -0.25                 | -0.66 ~ 0.15   | 0.223   | -0.34                 | -0.61 ~ -0.07  | 0.015   | 0.001   | -0.002 ~ 0.005 | 0.484   |
| Total cholesterol  | mg/dL   | -0.23                 | -1.18 ~ 0.71   | 0.626   | -0.28                 | -0.92 ~ 0.35   | 0.378   | 0.001   | -0.008 ~ 0.009 | 0.892   |
| HDL cholesterol    | mg/dL   | -0.84                 | -3.07 ~ 1.38   | 0.457   | -0.34                 | -1.83 ~ 1.15   | 0.657   | -0.010  | -0.030 ~ 0.010 | 0.335   |
| LDL cholesterol    | mg/dL   | 0.01                  | -1.10 ~ 1.12   | 0.984   | 0.00                  | -0.74 ~ 0.74   | 0.997   | 0.002   | -0.008 ~ 0.012 | 0.720   |
| ALT                | U/L     | -0.58                 | -3.14 ~ 1.97   | 0.654   | -0.35                 | -2.07 ~ 1.36   | 0.685   | 0.005   | -0.019 ~ 0.028 | 0.694   |
| AST                | U/L     | -0.58                 | -4.82 ~ 3.67   | 0.790   | -0.16                 | -3.00 ~ 2.69   | 0.914   | 0.005   | -0.034 ~ 0.044 | 0.815   |
| $\gamma$ -GTP      | U/L     | -0.34                 | -1.16 ~ 0.49   | 0.428   | -0.48                 | -1.04 ~ 0.07   | 0.088   | 0.006   | -0.002 ~ 0.014 | 0.125   |
| Creatinine         | mg/dL   | -22.11                | -82.14 ~ 37.92 | 0.470   | -22.53                | -62.73 ~ 17.67 | 0.272   | -0.078  | -0.630 ~ 0.475 | 0.783   |
| Urea nitrogen      | mg/dL   | -4.73                 | -12.78 ~ 3.31  | 0.249   | -2.56                 | -7.95 ~ 2.84   | 0.353   | -0.012  | -0.087 ~ 0.062 | 0.741   |
| Plasma pentosidine | pmol/mL | -1.91                 | -3.99 ~ 0.17   | 0.072   | -0.54                 | -1.93 ~ 0.86   | 0.450   | -0.009  | -0.028 ~ 0.010 | 0.346   |
| SBP                | mmHg    | -1.09                 | -3.18 ~ 1.01   | 0.309   | -0.66                 | -2.07 ~ 0.74   | 0.355   | -0.011  | -0.031 ~ 0.008 | 0.248   |
| DBP                | mmHg    | -3.45                 | -6.45 ~ -0.44  | 0.025   | -3.39                 | -5.40 ~ -1.38  | 0.001   | -0.007  | -0.034 ~ 0.021 | 0.642   |

Model 2: Adjusted for age, sex, BMI, antihypertensive use, physical activity (non-winter and winter seasons), smoking, and alcohol consumption.

$\gamma$ -GTP,  $\gamma$ -glutamyl transferase; ALT, alanine transaminase; AST, aspartate transaminase; CI, confidence interval; DBP, diastolic blood pressure; HbA1c, hemoglobin A1c; HDL, high density lipoprotein; HF, high-frequency component power; LDL, low density lipoprotein; LF, low-frequency component power; SBP, systolic blood pressure.
